# Supplementary material for: Longitudinal Association of Universal Screening and Treatment for Major Depressive Disorder with Survival in Cancer Patients
Source: MDPI journal article supplement (doi:10.3390/jpm12081213), 2022-07-26
Supplement: s1 [file s1]

# Supplementary Materials

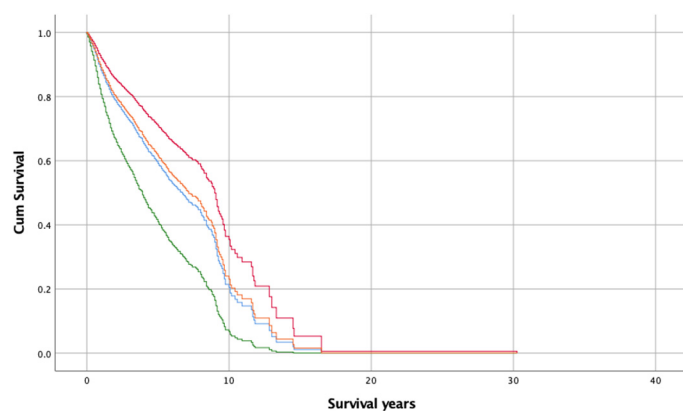

(a) — Already treated for MDD before cancer diagnosis — Nonadherence to MDD treatment after cancer diagnosis  
— Adherence to MDD treatment after cancer diagnosis — No MDD diagnosis

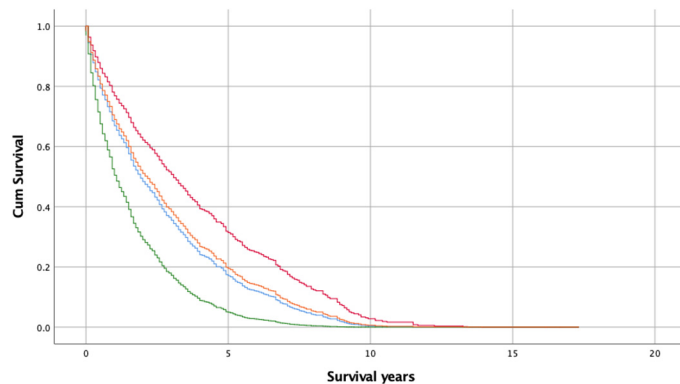

(b) — Already treated for MDD before cancer diagnosis — Nonadherence to MDD treatment after cancer diagnosis  
— Adherence to MDD treatment after cancer diagnosis — No MDD diagnosis

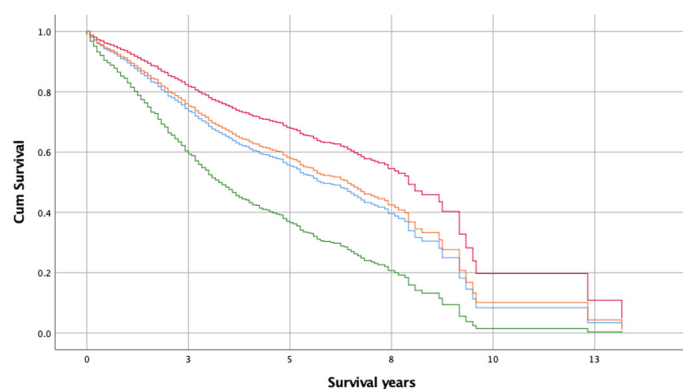

(c) — Already treated for MDD before cancer diagnosis — Nonadherence to MDD treatment after cancer diagnosis  
— Adherence to MDD treatment after cancer diagnosis — No MDD diagnosis

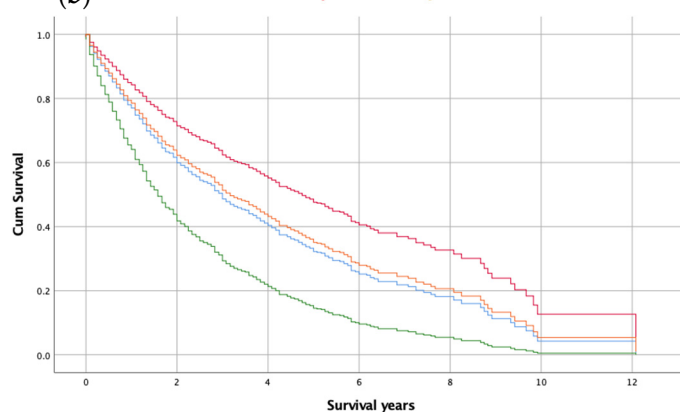

(d) — Already treated for MDD before cancer diagnosis — Nonadherence to MDD treatment after cancer diagnosis  
— Adherence to MDD treatment after cancer diagnosis — No MDD diagnosis

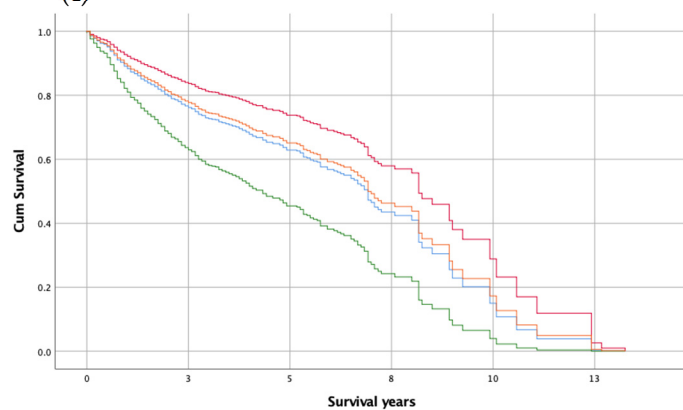

(e) — Already treated for MDD before cancer diagnosis — Nonadherence to MDD treatment after cancer diagnosis  
— Adherence to MDD treatment after cancer diagnosis — No MDD diagnosis

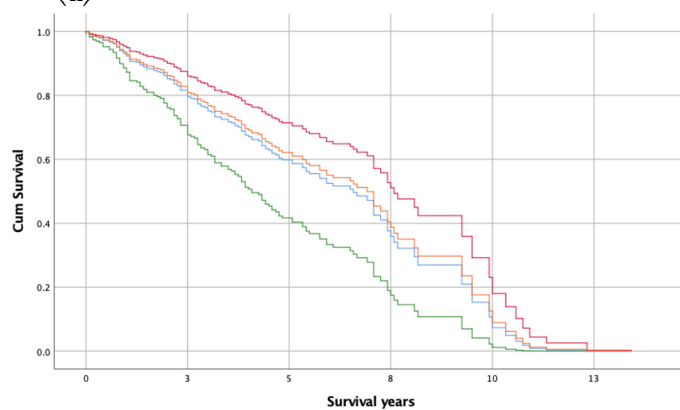

(f) — Already treated for MDD before cancer diagnosis — Nonadherence to MDD treatment after cancer diagnosis  
— Adherence to MDD treatment after cancer diagnosis — No MDD diagnosis

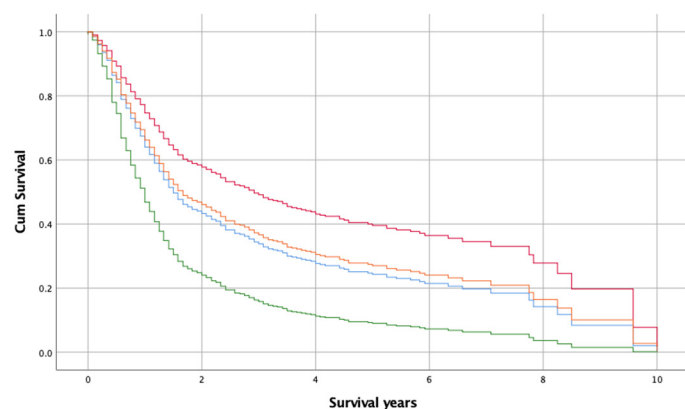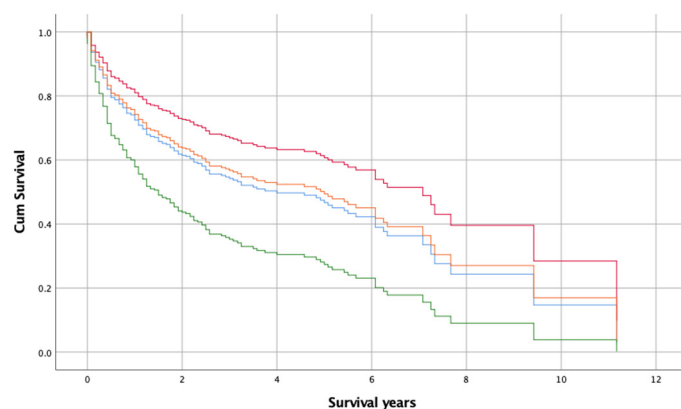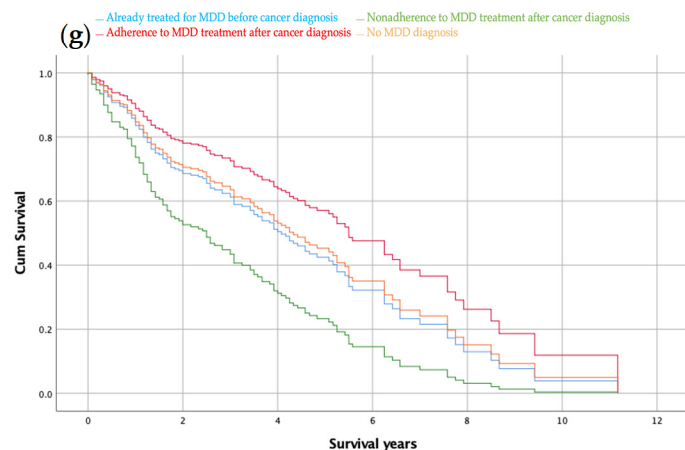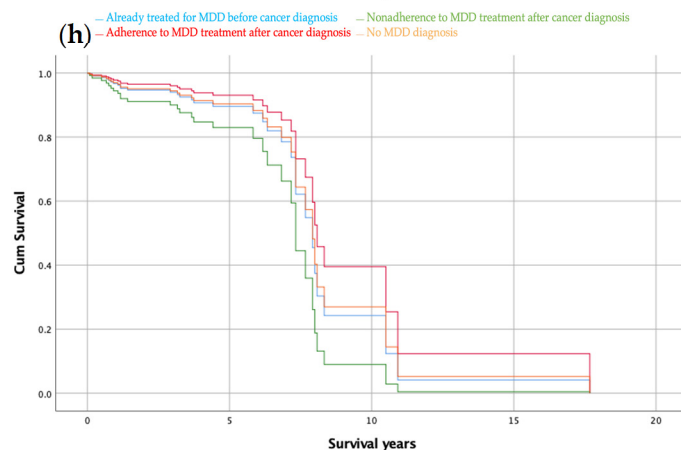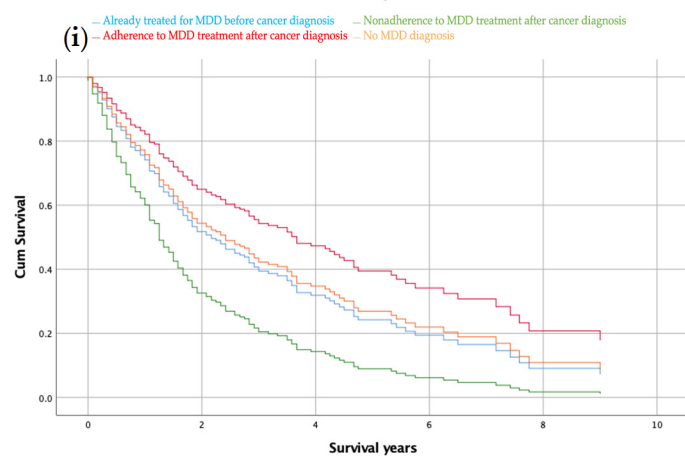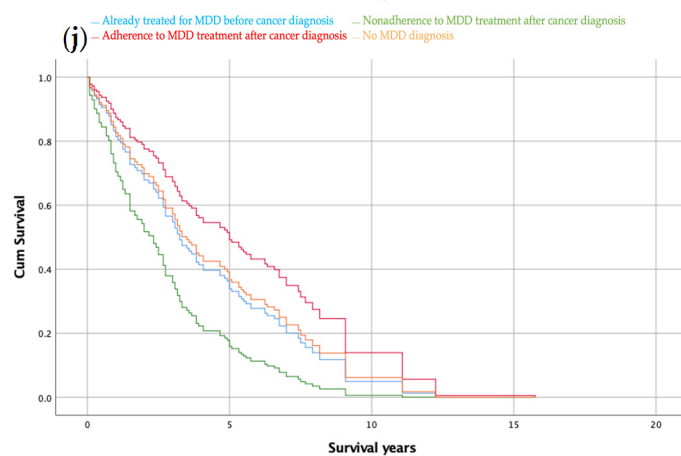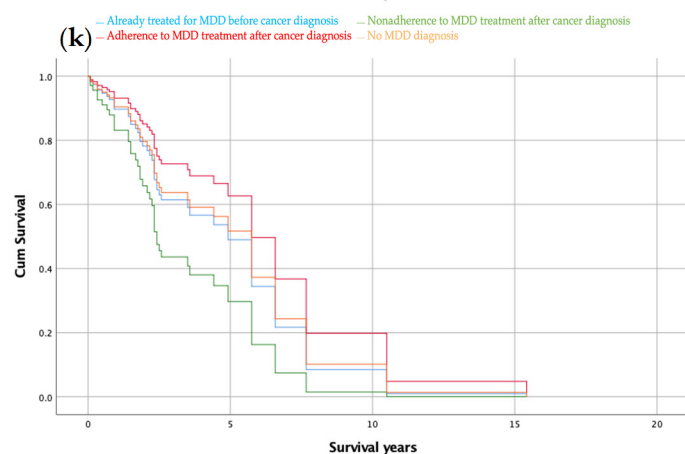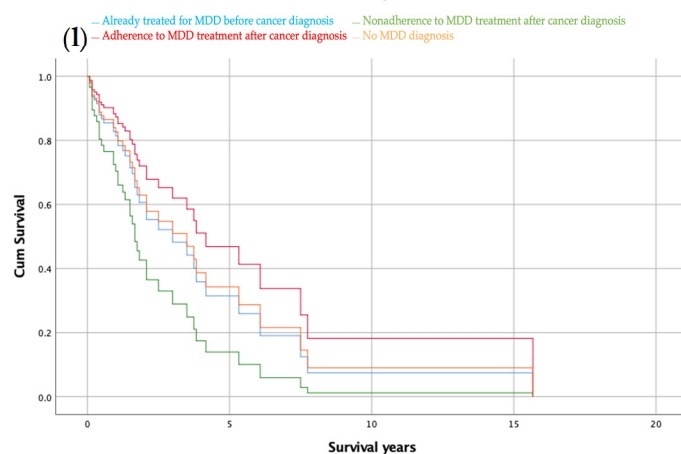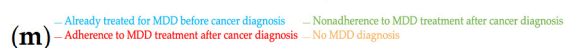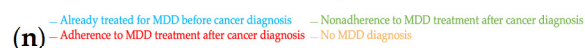

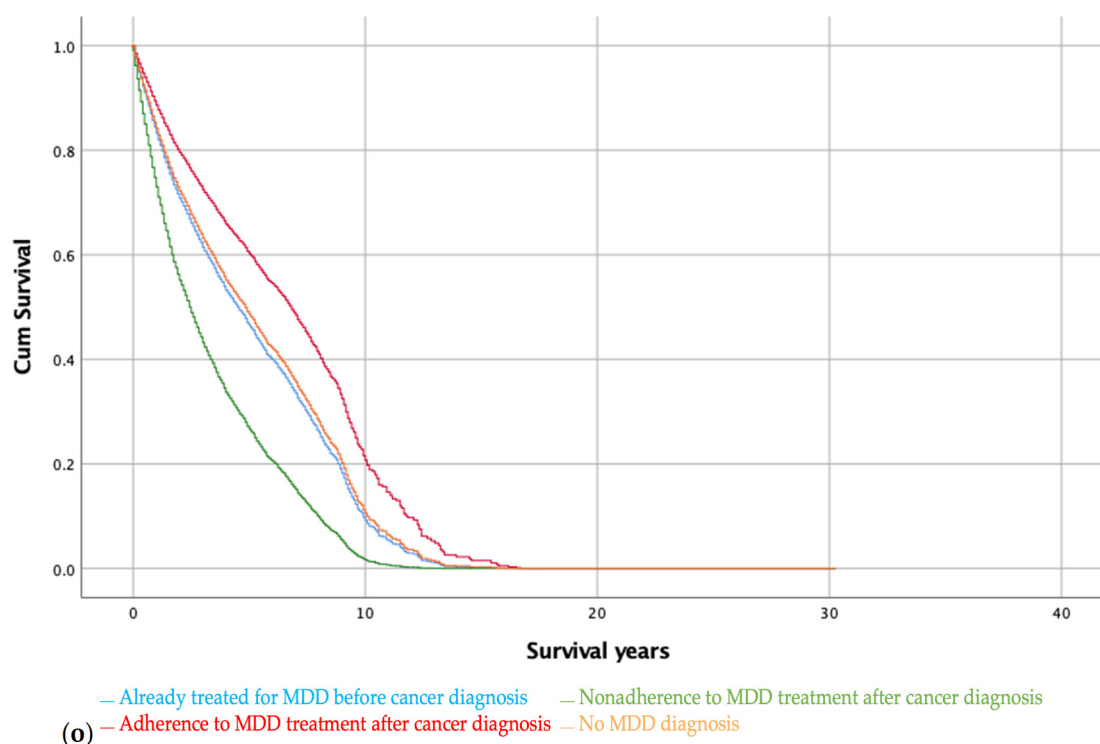

**Figure S1.** Survival functions of the Cox proportional hazards regression model stratified by (a) head/neck, (b) liver/pancreas, (c) colorectal, (d) lung, (e) genitourinary, (f) breast, (g) esophagus, (h) hematological, (i) gynecological, (j) thyroid, (k) gastrointestinal, (l) bladder, (m) skin, (n) brain/nerves, and (o) overall, after adjustment for sex, age at cancer diagnosis, age at screening for MDD, and cancer stage. MDD: major depressive disorder.
